# Supplementary material for: Biofunctional peptide-click PEG-based hydrogels as 3D cell scaffolds for corneal epithelial regeneration
Source: Royal Society of Chemistry journal article supplement (doi:10.1039/d2tb00983h), 2022-01-01
Supplement: d2tb00983h1.pdf [file d2tb00983h1.pdf]

## **Supporting information**

### **Biofunctional peptide-click PEG-based hydrogel as a 3D cell scaffold for corneal epithelial regeneration**

Lei Lei, Yuhan Hu, Hui Shi, Zhishu Bao, Yiping Wu, Jun Jiang\*, Xingyi Li\*

Institute of Biomedical Engineering, School of Ophthalmology & Optometry and Eye

Hospital, Wenzhou Medical University, 270 Xueyuan Road, Wenzhou 325027, P. R. China

---

\* Corresponding author: Jun Jiang and Xingyi Li, School of Ophthalmology & Optometry and Eye Hospital, Wenzhou Medical University, 270 Xueyuan Road, Tel.: +86 577 88053536; fax: +86 577 88053536 E-mail: [jjhsj@hotmail.com](mailto:jjhsj@hotmail.com) (Jiang J) and [lixingyi\\_1984@mail.eye.ac.cn](mailto:lixingyi_1984@mail.eye.ac.cn) (Li XY)

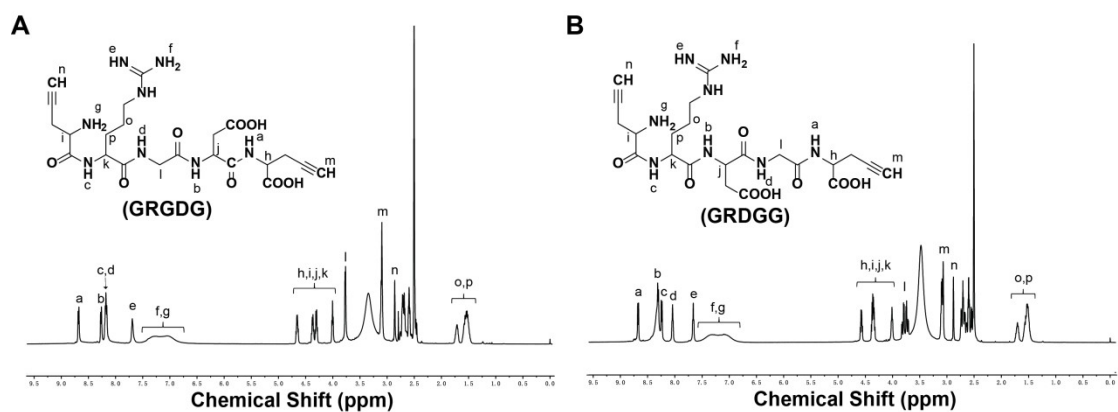

**Fig. S1.**  $^1\text{H}$ -NMR spectra of **(A)** GRGDG and **(B)** GRDGG di-propargylated peptide in  $\text{DMSO-d}_6$ .

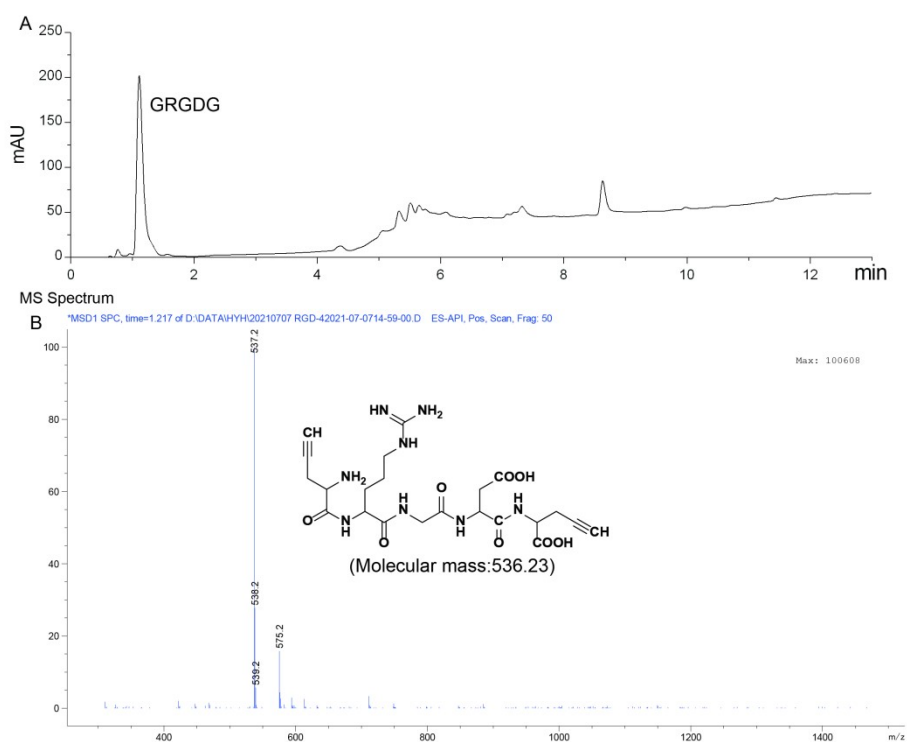

**Fig. S2.** **(A)** The DAD signal of GRGDG peptide measured by HPLC at 220 nm; **(B)** MS spectrum of GRGDG peptide.

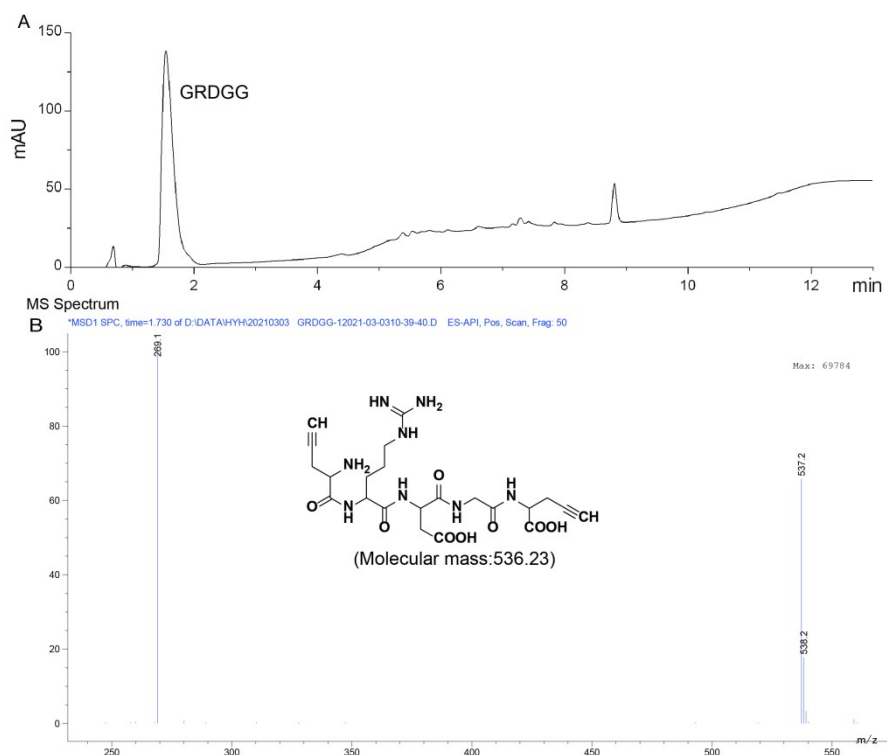

**Fig. S3.** (A) The DAD signal of GRDGG peptide measured at 220 nm; (B) MS spectrum of GRDGG peptide.

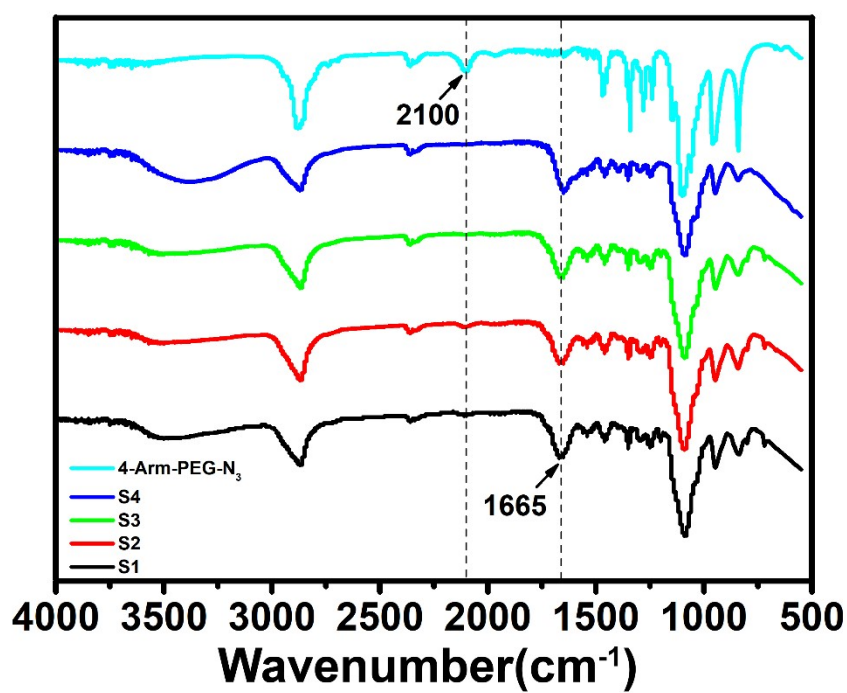

**Fig. S4.** ATR-FTIR spectra of the various lyophilized PEG-peptide hydrogels (S1, S2, S3, and S4) and 4-arm-PEG- $N_3$ .

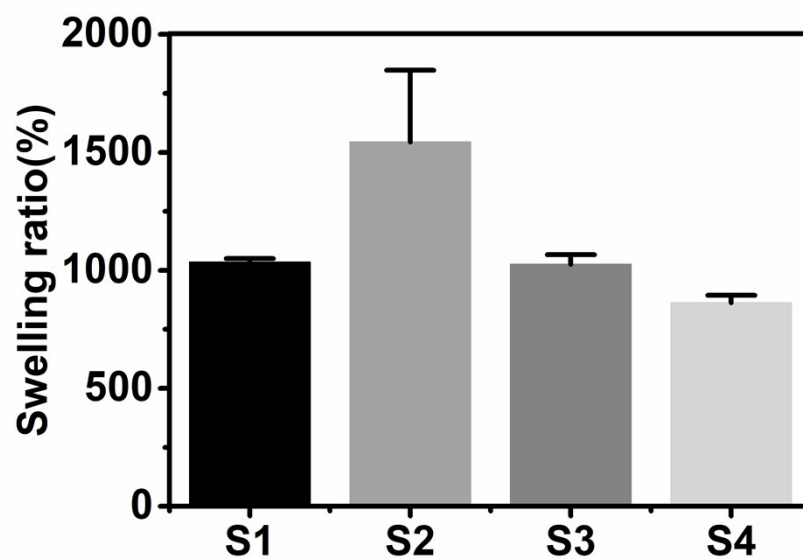

**Fig. S5.** The equilibrium swelling ratios of the various PEG-peptide hydrogels (S1, S2, S3, and S4) measured at 48 h.

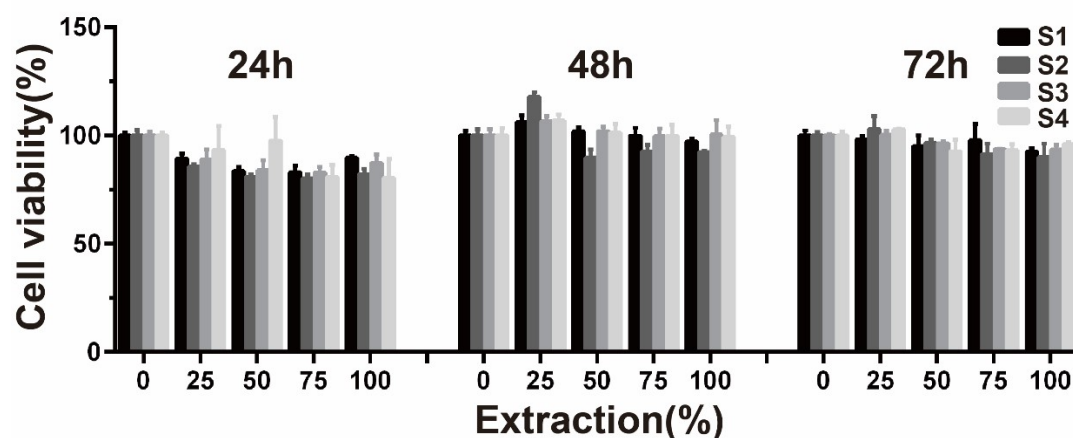

**Fig. S6.** Viability of HCECs cultured in 0%, 25%, 50%, 75%, and 100% extracts of the various PEG-peptide hydrogels (S1, S2, S3, and S4) at 24, 48, and 72 h.

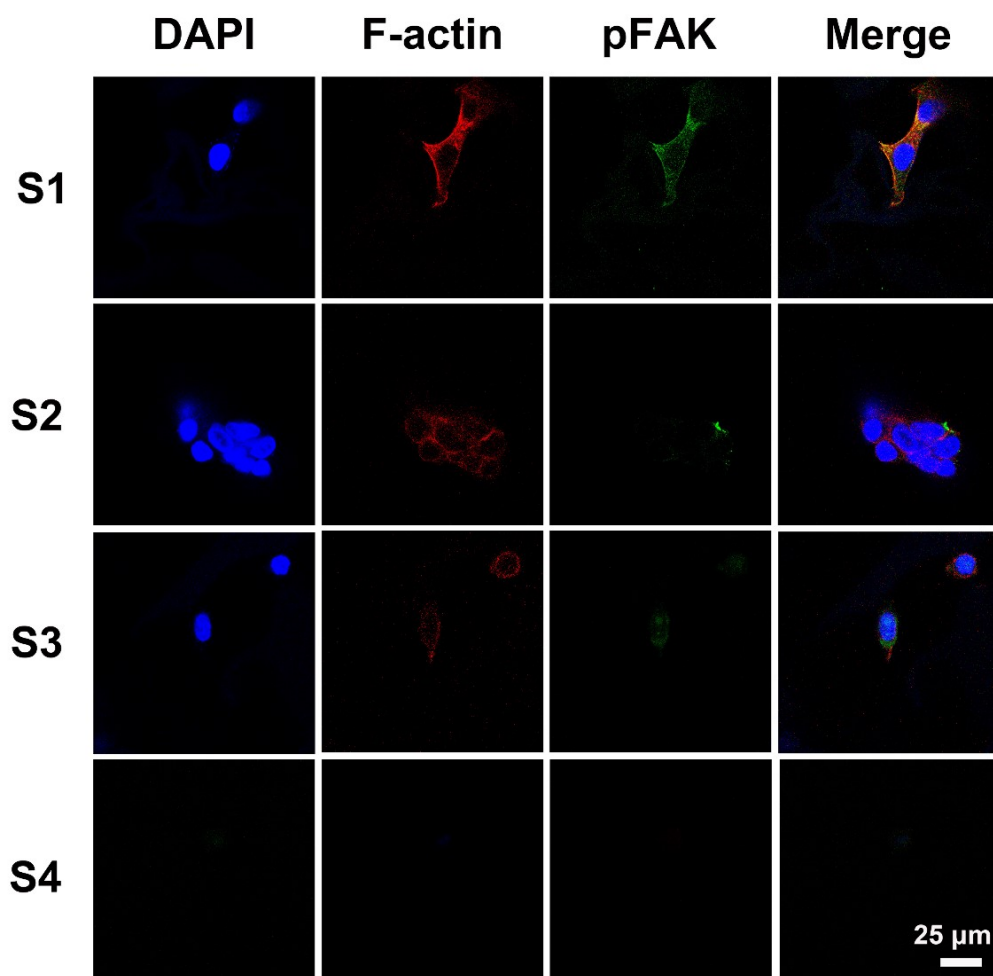

**Fig. S7.** Representative images of immunofluorescence staining against F-actin (red), nuclei (blue), and pFAK (green) of HCECs seeding on the various PEG-peptide hydrogels (S1, S2, S3, and S4) at 24 h.
